# Supplementary material for: Tunable multiple light emissions of core–shell structures based on rare earth ions doped on the surfaces of organic cocrystals
Source: Royal Society of Chemistry journal article supplement (doi:10.1039/d2cp02288e), 2022-01-01
Supplement: d2cp02288e1.pdf [file d2cp02288e1.pdf]

## Electronic Supplementary Information

### **Tunable multiple light emissions of core-shell structures based on rare earth ions doped on the surfaces of organic cocrystals**

Jing Wang,<sup>a,b\*</sup> Shuping Xu,<sup>c</sup> Xiangxin Xue,<sup>a,b</sup> Lina Zhao<sup>a,b\*</sup> Weiqing Xu<sup>c\*</sup>

- a. Key Laboratory of Preparation and Application of Environmental Friendly Materials, Jilin Normal University, Ministry of Education, Changchun, 130103, P. R. China.
- b. College of Chemistry, Jilin Normal University, Siping, 136000, P.R. China.
- c. State Key Laboratory of Supramolecular Structure and Materials, Institute of Theoretical Chemistry, College of Chemistry, Jilin University, Changchun 130012, P. R. China

E-mail: wangjing2008hj@163.com (J Wang); zhaolina1975@163.com (L. Zhao);

E-mail: xuwq@jlu.edu.cn (W. Xu)

**Table S1.** The crystallographic data of Phen-TCNB cocrystal derived from the single-crystal X-ray diffraction measurements.

| <b>Compound</b>                                        | <b>Phen-TCNB</b>  |
|--------------------------------------------------------|-------------------|
| <b>CCDC No</b>                                         | 2160259           |
| <b>Formula</b>                                         | $C_{22}H_{10}N_6$ |
| <b>Weight (g/mol)</b>                                  | 358.36            |
| <b>Crystal system</b>                                  | monoclinic        |
| <b>Space-group</b>                                     | P21/c             |
| <b>Temperature</b>                                     | 297 K             |
| <b>Lattice parameter a (Å)</b>                         | 16.5206(5)        |
| <b>Lattice parameter b (Å)</b>                         | 7.6490(3)         |
| <b>Lattice parameter c (Å)</b>                         | 14.4843(5)        |
| <b>Cell parameter <math>\alpha(^{\circ})</math></b>    | 90                |
| <b>Lattice parameter <math>\beta(^{\circ})</math></b>  | 91.550(1)         |
| <b>Lattice parameter <math>\gamma(^{\circ})</math></b> | 90                |
| <b>Cell volume (Å<sup>3</sup>)</b>                     | 1829.65(11)       |
| <b>Formula units per cell Z</b>                        | 4                 |
| <b>Calculated density (g•cm<sup>-3</sup>)</b>          | 1.301             |
| <b>Mu(mm-1)</b>                                        | 0.082             |
| <b>F(000)</b>                                          | 736.0             |
| <b>F(000)'</b>                                         | 736.23            |
| <b>h,k,l,(max)</b>                                     | 20,9,18           |
| <b>Nref</b>                                            | 3766              |
| <b>R reflections</b>                                   | 0.0473            |
| <b>wR2</b>                                             | 0.1426            |

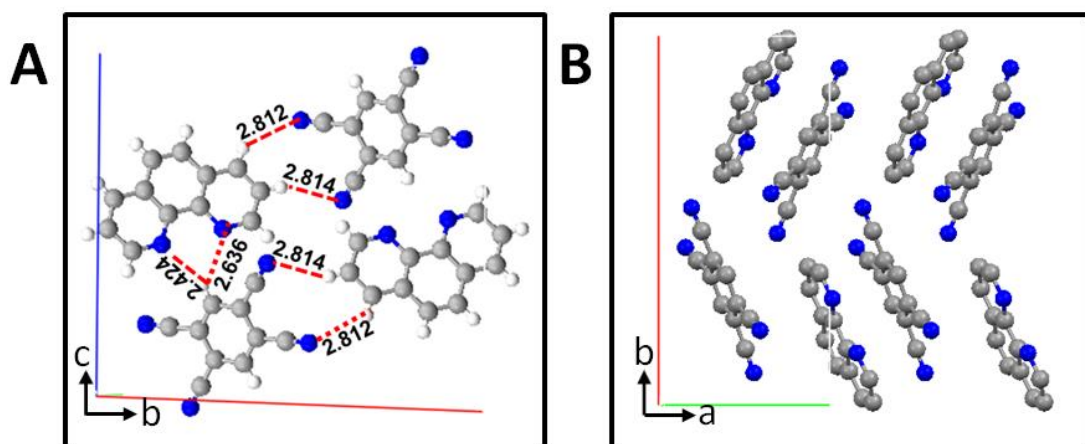

**Fig S1.** (A) Hydrogen-bond interactions and (B) The close-packed structures of Phen and TCNB along *a* axis.

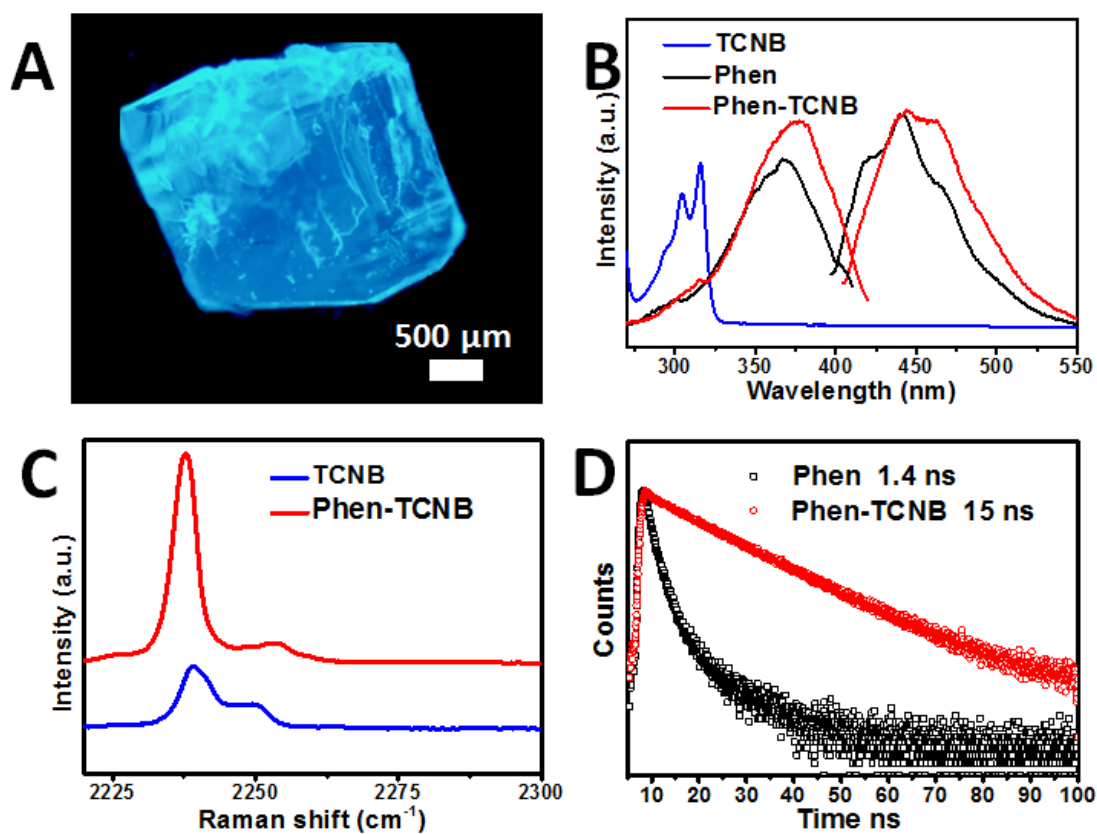

**Fig S2.** (A) Fluorescent images, (B) emission/excitation spectra, and (C) Raman spectra of Phen-TCNB cocrystal and TCNB power. (D) The fluorescent lifetimes of Phen-TCNB cocrystal and Phen crystal, respectively.

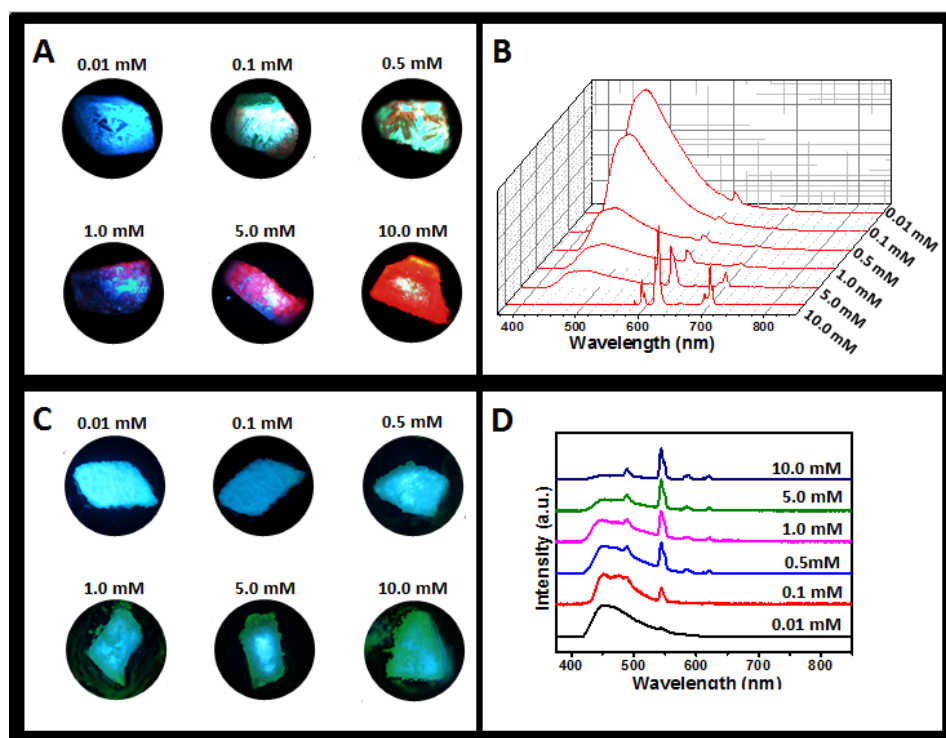

**Fig S3.** The micro-imagings and fluorescent spectra of the core-shell I (A and B) and core-shell II (C and D) which were prepared by using increasing concentrations of RE ions ethanol solutions via epitaxial growth method.

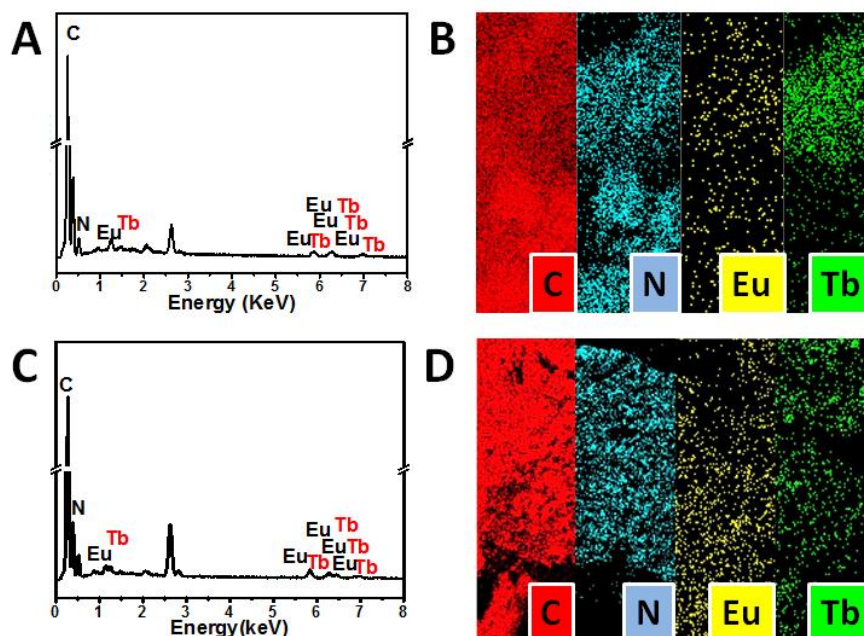

**Fig S4.** (A, C) EDX spectrum and (B, D) EDX elemental mapping profile of the core-shell III and IV.

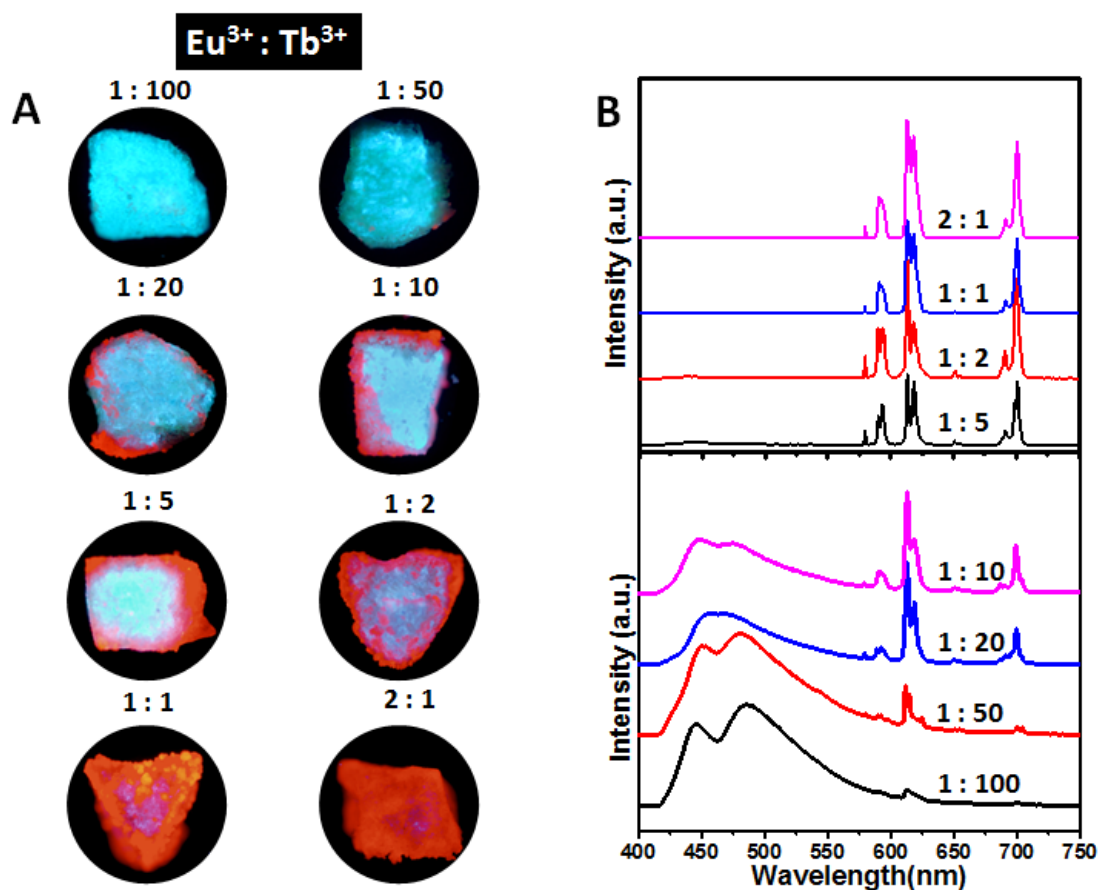

**Fig S5.** (A) Fluorescent images and (B) fluorescent spectra of core-shell III, prepared by dripping different  $\text{Eu}^{3+}/\text{Tb}^{3+}$  mixed solutions (different molar ratios of  $\text{Eu}^{3+}/\text{Tb}^{3+}$ ) on the Phen-TCNB cocrystals.

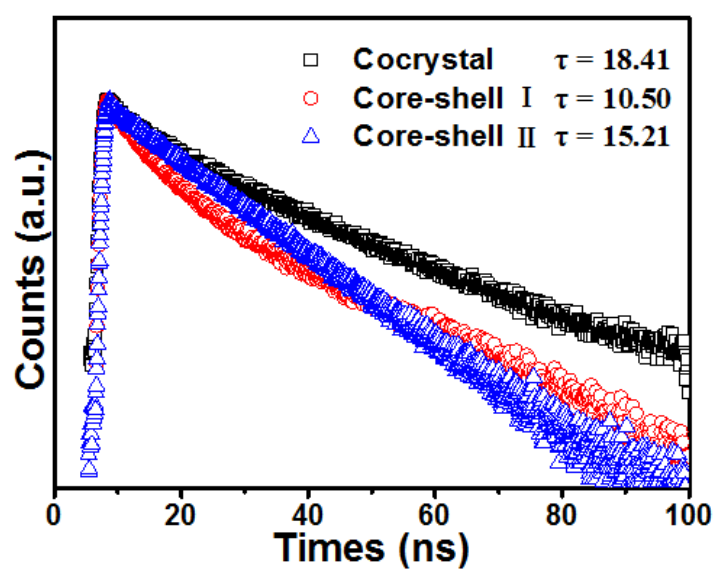

**Fig S6.** The fluorescence decay curves of cocrystal and core-shell I and II were collected upon the emission peaks of 435 nm, respectively
